# Supplementary material for: A drug-inducible sex-separation technique for insects
Source: PubMed Central journal article supplement (PMC7193620; doi:10.1038/s41467-020-16020-2), 2020-04-30
Supplement: 41467_2020_16020_MOESM1_ESM.pdf [file 41467_2020_16020_MOESM1_ESM.pdf]

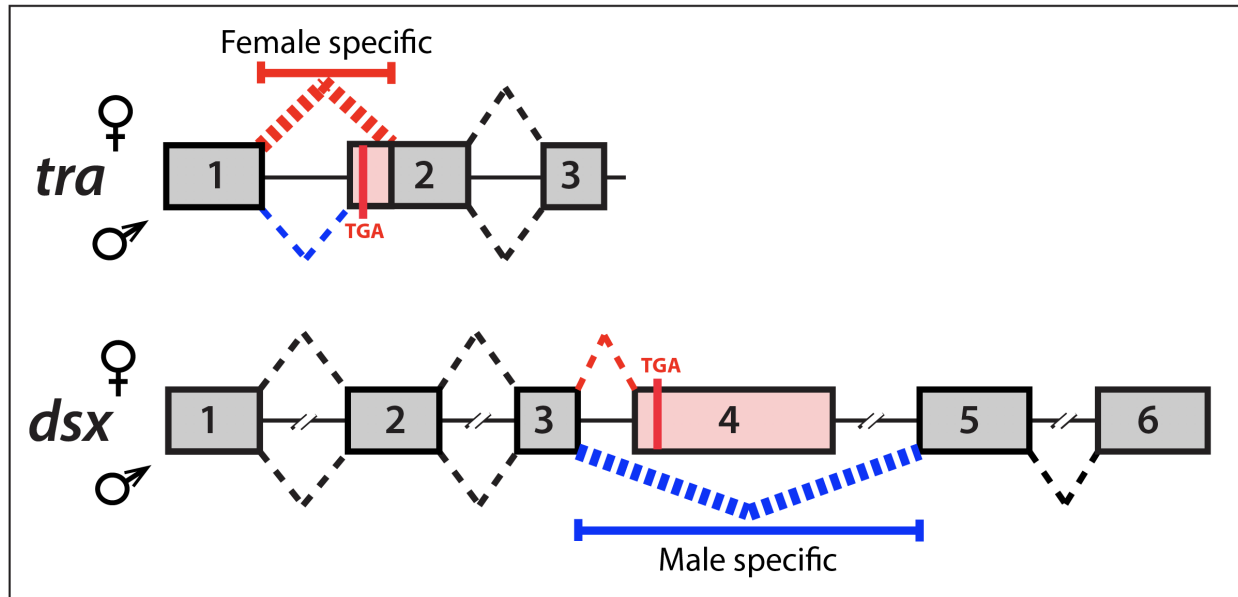

**Supplementary Fig 1 Sex-specific alternative splicing of *Drosophila transformer* (*tra*) and *double sex* (*dsx*) genes.** The female-specific intron between *tra* exons 1 and 2 (*traF*) is spliced out entirely in females, while in males some sequence remains, producing a stop codon and resulting in a premature termination of the TRA protein<sup>44</sup>. Inversely, the male-specific intron between *dsx* exons 3 and 5 (*dsxM*) is spliced out in males, while in females only its small part is spliced out and an entire exon 4 carrying a premature stop codon remains<sup>45</sup>. To establish female- or male-specific expression of antibiotic-resistance genes, we inserted a *traF* or *dsxM* intron sequence into the coding sequence of *PuroR* and *NeoR*.
