# Supplementary material for: A drug-inducible sex-separation technique for insects
Source: PubMed Central journal article supplement (PMC7193620; doi:10.1038/s41467-020-16020-2), 2020-04-30
Supplement: 41467_2020_16020_MOESM7_ESM.pdf [file 41467_2020_16020_MOESM7_ESM.pdf]

**Title: Supplementary Data 1:** Development of sex-sorter system.

**Description:** This supplementary excel file contains the raw count data underlying Fig. 1b–c and Fig. 2b–c.

**Title: Supplementary Data 2:** Titration of drug concentration for the homozygous sex-sorter line.

**Description:** This supplementary excel file contains the raw count data underlying Fig. 3a–b.

**Title: Supplementary Data 3:** Survival rate of the homozygous sex-sorter line. **Description:**

**Description:** This supplementary excel file contains the raw count data / analysis underlying Fig. 3c–d.
